# Supplementary material for: Acidic ammonothermal growth of GaN crystals using GaN powder as a nutrient
Source: Royal Society of Chemistry journal article supplement (doi:10.1039/c3ce40448j), 2013-01-01
Supplement: c3ce40448j.pdf [file c3ce40448j.pdf]

## Supporting information

### Acidic ammonothermal growth of GaN crystal using GaN powder as nutrient

**Quanxi Bao,<sup>a, c</sup> Takanori Hashimoto,<sup>a</sup> Fukuma Sato,<sup>a</sup> Kouji Hazu,<sup>a</sup> Makoto Saito,<sup>a, b</sup> Yuji Kagamitani,<sup>b</sup> Takayuki Ishinabe,<sup>b</sup> Rinzo Kayano,<sup>c</sup> Daisuke Tomida,<sup>a</sup> Kun Qiao,<sup>\*a</sup> Shigefusa F. Chichibu,<sup>a</sup> Tohru Ishiguro<sup>a</sup> and Chiaki Yokoyama<sup>a</sup>**

<sup>a</sup>*Institute of Multidisciplinary Research for Advanced Materials, Tohoku University, 2-1-1 Katahira, Aoba-ku, Sendai 980-8577, Japan*

<sup>b</sup>*Mitsubishi Chemical Corp., 1000 Higashi-Mamiana, Ushiku, Ibaraki 300-1295, Japan*

<sup>c</sup>*The Japan Steel Works, Ltd., 11-1, Osaki 1-chome, Shinagawa-ku, Tokyo 141-0032, Japan*

Figure 1. Ammonothermal crystal growth of GaN using polycrystalline GaN at 150 MPa

Figure 2. Top-view (left) and cross-sectional (right) photographs of GaN crystals grown using polycrystalline GaN with different thickness. (a) 50 $\mu$ m; (b) 200 $\mu$ m; (c) 374 $\mu$ m

Figure 3. XRC from 002 reflections of GaN crystals grown using polycrystalline GaN with different thickness.

Figure 4. SEM images of GaN crystals grown using grown using polycrystalline GaN with different thickness.

Figure 5. Images of HVPE seed and different nutrients

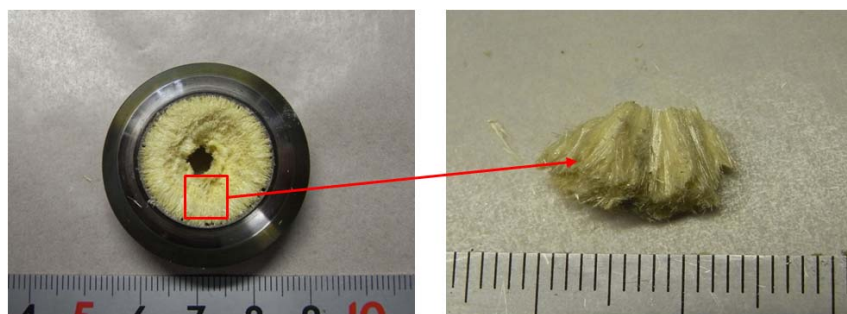

Figure 1. Ammonothermal crystal growth of GaN using polycrystalline GaN at 150 MPa

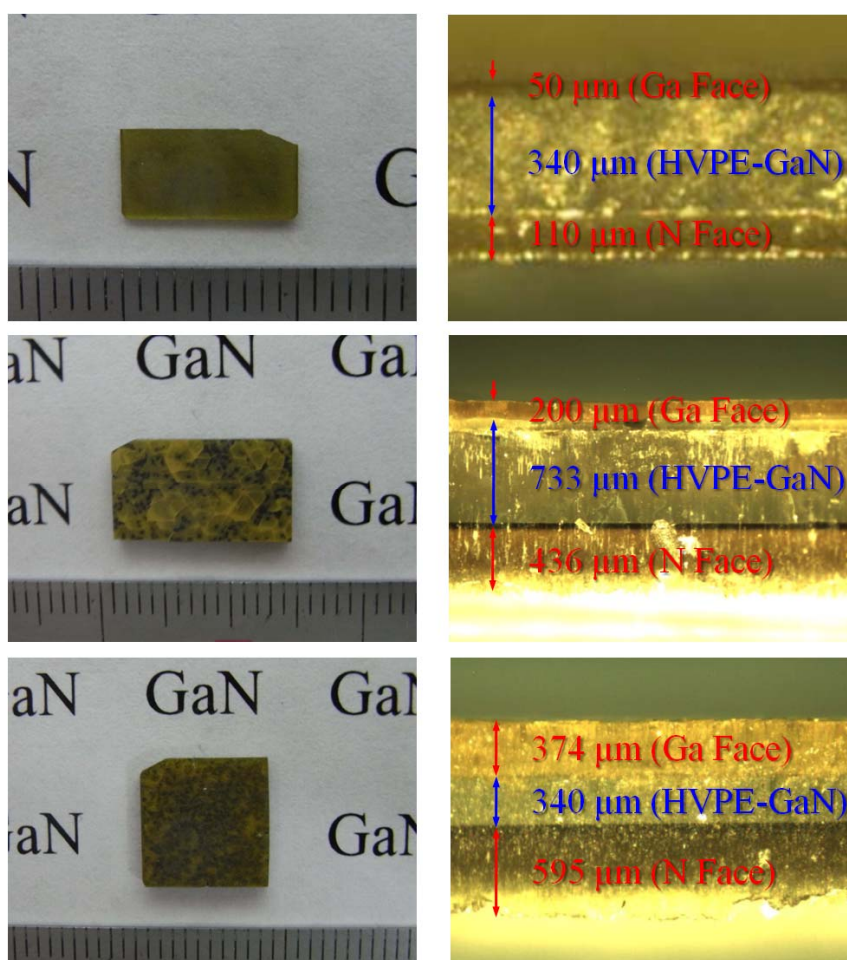

Figure 2. Top-view (left) and cross-sectional (right) photographs of GaN crystals grown using polycrystalline GaN with different thickness. (a) 50 μm; (b) 200 μm; (c) 374 μm.

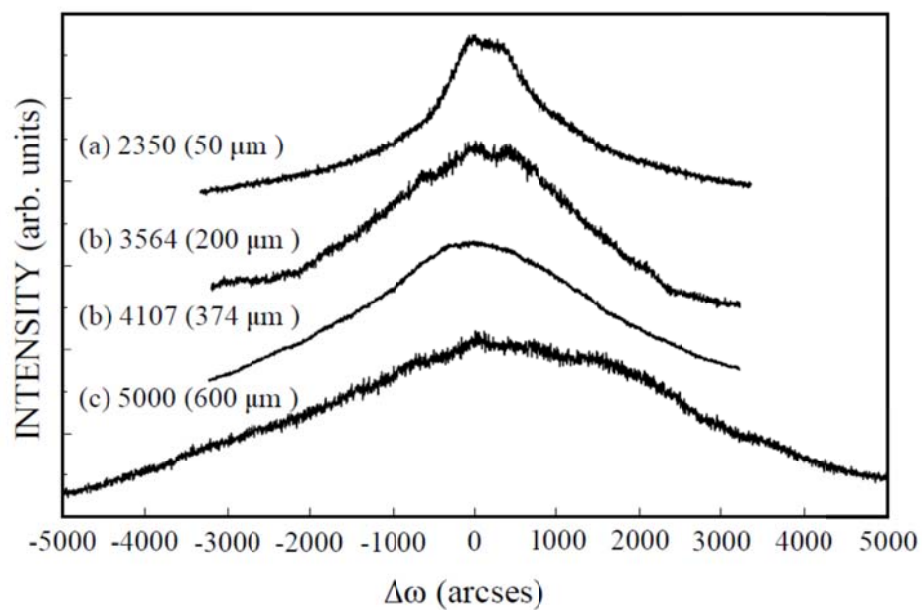

Figure 3. XRC from 002 reflections of GaN crystals grown using polycrystalline GaN with different thickness.

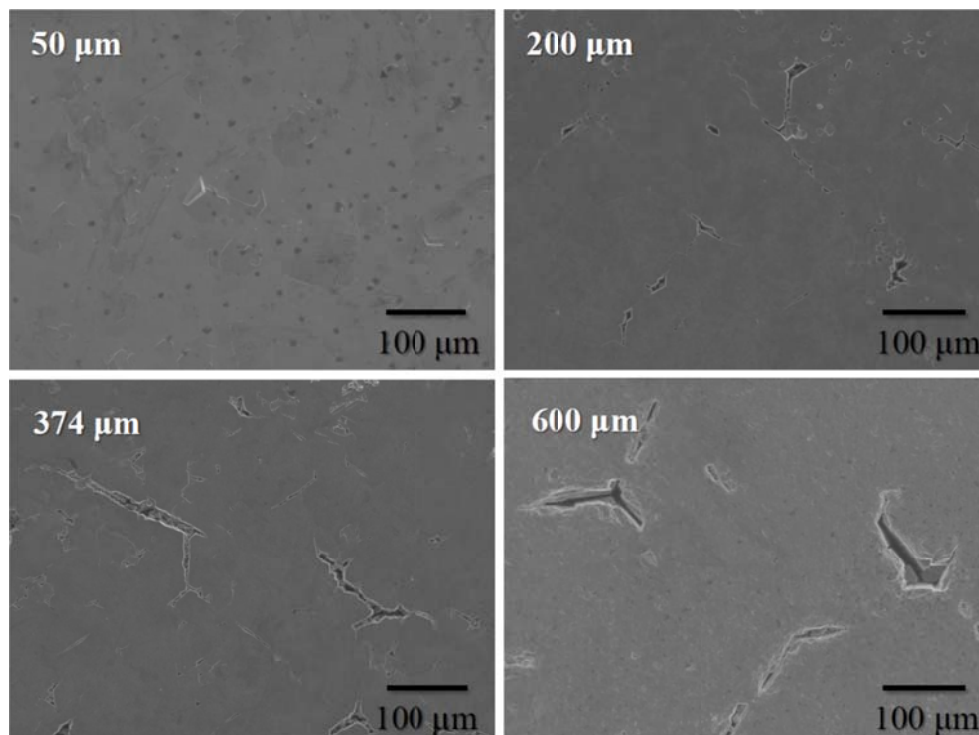

Figure 4. Representative SEM images of GaN crystals grown using polycrystalline GaN with different thickness.

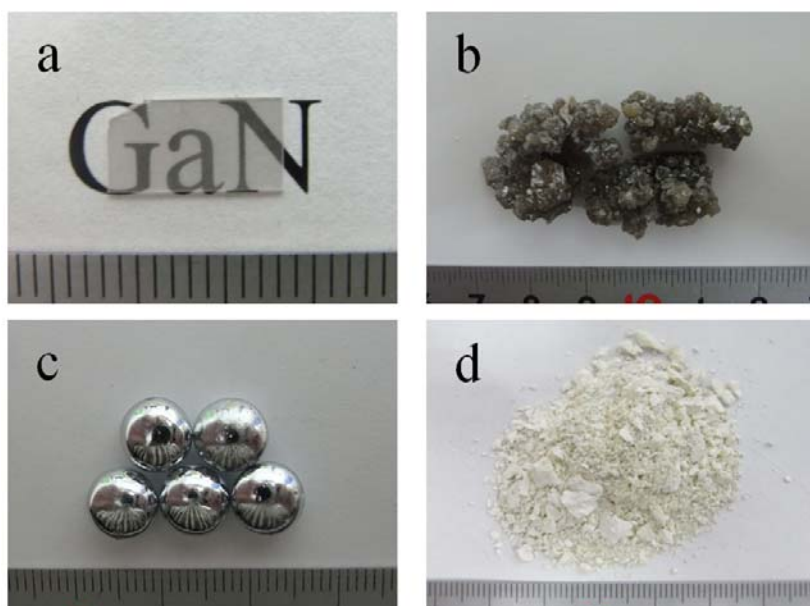

Figure 5. Images of HVPE seed and different nutrients. (a) HVPE seed; (b) polycrystalline GaN; (c) Ga metal; (d) GaN powder.

As can be seen from Fig. 5, the HVPE seed is color-less and transparent before growth experiment. Unfortunately, however, resultant crystals usually suffered from the coloring, especially in the case of polycrystalline GaN, which tend to give darker color than Ga metal or GaN powder.

On the basis of our experiences with the acidic ammonothermal crystal growth of GaN, the coloring of GaN films is a very complex issue. Possible origins include the following:

- 1) Concentration of O species in the growth environment. O can come from the residual air in the autoclave, nutrient and mineralizer.
- 2) Concentrations of Ga vacancies and N vacancies in GaN films. This depends on the growth parameters such as temperature, pressure, nutrient and mineralizer.
- 3) Other impurities such as Fe, Ni coming from the autoclave.
